# Supplementary material for: Differential regulation of host plant adaptive genes in Pieris butterflies exposed to a range of glucosinolate profiles in their host plants
Source: PubMed Central journal article supplement (PMC6510735; doi:10.1038/s41598-019-43703-8), 2019-05-10
Supplement: 41598_2019_43703_MOESM1_ESM.pdf [file 41598_2019_43703_MOESM1_ESM.pdf]

## Supplementary information

### **Differential regulation of host plant adaptive genes in *Pieris* butterflies exposed to a range of glucosinolate profiles in their host plants**

Yu Okamura\*<sup>1,3</sup>, Ai Sato<sup>1</sup>, Natsumi Tsuzuki<sup>1</sup>, Yuji Sawada<sup>2</sup>, Masami Yokota Hirai<sup>2</sup>, Hanna Heidel-Fischer<sup>3,4</sup>, Michael Reichelt<sup>5</sup>, Masashi Murakami<sup>1</sup>, Heiko Vogel<sup>3</sup>

1 Community Ecology Lab., Faculty of Science, Chiba University, 263-8522, Chiba, Japan

2 RIKEN Center for Sustainable Resource Science, 1-7-22 Suehiro-cho, Tsurumi-ku, Yokohama, Kanagawa 230-0045, Japan

3 Department of Entomology, Max Planck Institute for Chemical Ecology, Hans-Knöll-Str. 8, 07745, Jena, Germany

4 Leibniz Institute for Natural Product Research and Infection Biology

Hans Knöll Institute (HKI), Beutenbergstraße 11a, 07745 Jena, Germany

5 Department of Biochemistry, Max Planck Institute for Chemical Ecology, Hans-Knöll-Str. 8, 07745, Jena, Germany

**Table S1** Detected mean GLS relative concentration (peak area/IS area) from two Brassicaceae plants ( $n = 3$ ).

| GLS    | GLS Class | <i>A. kamchatica</i> | sd      | <i>C. occulta</i> | sd       |
|--------|-----------|----------------------|---------|-------------------|----------|
| B3E    | aliphatic | 0.00548              | 0.00073 | n.d.              |          |
| 4MB3E  | aliphatic | 0.00001              | 0.00001 | n.d.              |          |
| 2P     | aliphatic | 0.11112              | 0.01257 | 0.00676           | 0.00074  |
| 3MSOP  | aliphatic | 0.11458              | 0.00264 | n.d.              |          |
| 4MSOB  | aliphatic | 0.00600              | 0.00149 | n.d.              |          |
| 5MSOP  | aliphatic | 0.07528              | 0.00089 | n.d.              |          |
| 6MSOH  | aliphatic | 3.09546              | 0.24712 | 0.00081           | 0.00061  |
| 7MSOH  | aliphatic | 6.15111              | 0.49682 | 0.00021           | 0.00022  |
| 8MSOO  | aliphatic | 0.17269              | 0.01765 | n.d.              |          |
| 3MTP   | aliphatic | 0.02138              | 0.00337 | n.d.              |          |
| 4MTB   | aliphatic | 0.00158              | 0.00189 | 0.00012           | 0.00022  |
| 5MTP   | aliphatic | 0.00607              | 0.00168 | n.d.              |          |
| 6MTH   | aliphatic | 0.12837              | 0.01493 | <0.00001          | <0.00001 |
| 7MTH   | aliphatic | 0.16384              | 0.02104 | 0.00001           | 0.00002  |
| 8MTO   | aliphatic | 0.00123              | 0.00075 | n.d.              |          |
| 3OHP   | aliphatic | 3.85571              | 0.13843 | n.d.              |          |
| 4OHB   | aliphatic | 0.00228              | 0.00129 | n.d.              |          |
| 3BZOP  | aliphatic | 0.00003              | 0.00002 | n.d.              |          |
| 4BZOB  | aliphatic | 0.00001              | 0.00002 | n.d.              |          |
| Benzyl | benzylic  | 0.00088              | 0.00034 | 0.46314           | 0.00633  |
| PE     | benzylic  | 0.00017              | 0.00030 | 0.02360           | 0.00938  |
| S2H2P  | benzylic  | 0.00003              | 0.00005 | 0.00026           | 0.00017  |
| I3M    | indolic   | 0.11326              | 0.01255 | 0.07879           | 0.00908  |
| 1MOI3M | indolic   | n.d.                 |         | 0.00004           | 0.00007  |
| 4MOI3M | indolic   | 0.22289              | 0.01655 | 0.00078           | 0.00038  |

GLS abbreviations are as follows: B3E: But-3-enyl, 4MB3E: 4-(Methylsulfinyl)but-3-enyl, 2P: 2-propenyl, 3MSOP: 3-(Methylsulfinyl)propyl, 4MSOB: 4-(Methylsulfinyl)butyl, 5MSOP: 5-(Methylsulfinyl)pentyl, 6MSOH: 6-(Methylsulfinyl)hexyl, 7MSOH: 7-(Methylsulfinyl)heptyl, 8MSOO: 8-

(Methylsulfinyl)octyl, 3MTP: 3-(Methylthio)propyl, 4MTB: 4-(Methylthio)butyl, 5MTP: 5-(Methylthio)pentyl, 6MTH: 6-(Methylthio)hexyl, 7MTH: 7-(Methylthio)heptyl, 8MTO: 8-(Methylthio)octyl, 3OHP: 3-Hydroxypropyl, 4OHB: 4-Hydroxybutyl, 3BZOP: 3-(Benzoyloxy)propyl, 4BZOB: 4-(Benzoyloxy)butyl, Benzyl: Benzyl, PE: Phenethyl, S2H2P: (S)-2-Hydroxy-2-phenethyl, I3M : Indol-3-ylmethyl , 1MOI3M: 1-Methoxyindol-3-ylmethyl, 4MOI3M: 4-Methoxyindol-3-ylmethyl

**Table S2** Primer sequences for RT-qPCR in this research.

| Target Gene            | Sequences            | Primer efficiency; <i>P. melete</i> ( <i>P. napi</i> ) |
|------------------------|----------------------|--------------------------------------------------------|
| NSP-F                  | AATTGGCGGCTTTATACACG | 106% (91%)                                             |
| NSP-R                  | TTCTTTCCTTCGGCACTTGT |                                                        |
| MA-F                   | TGTTGCTAACGCACTGGAAG | 108% (91%)                                             |
| MA-R                   | CCCTCCAACGCAGTAATGAT |                                                        |
| SDMA-F                 | CCACGAGCTAAGCGGTAGAG | 102% (92%)                                             |
| SDMA_ <i>melete</i> -R | TGTCCATGGCCCTCTTAAAC |                                                        |
| SDMA_ <i>napi</i> -R   | CCATATTTCTGCCATTCGT  |                                                        |
| EF1 $\alpha$ -F        | AGGAATTGCGTCGTGGTTAC | 104% (103%)                                            |
| EF1 $\alpha$ -R        | GCAAGCAATGTGAGCTGTGT |                                                        |

**Table S3** Raw qPCR data of *P. melete* fed on *A. kamchatica* and *C. occulta*

| Target        | Plant species        | Sample         | Ct    |
|---------------|----------------------|----------------|-------|
| primer check  |                      |                |       |
| EF1 $\alpha$  |                      | undiluted      | 16.02 |
| EF1 $\alpha$  |                      | 1 to 10        | 19.09 |
| EF1 $\alpha$  |                      | 1 to 100       | 22.44 |
| EF1 $\alpha$  |                      | 1 to 1000      | 25.65 |
| EF1 $\alpha$  |                      | RNA            | NA    |
| MA            |                      | undiluted      | 17.98 |
| MA            |                      | 1 to 10        | 21.07 |
| MA            |                      | 1 to 100       | 24.43 |
| MA            |                      | 1 to 1000      | 27.31 |
| MA            |                      | RNA            | 30.05 |
| NSP           |                      | undiluted      | 15.12 |
| NSP           |                      | 1 to 10        | 18.08 |
| NSP           |                      | 1 to 100       | 21.49 |
| NSP           |                      | 1 to 1000      | 24.55 |
| NSP           |                      | RNA            | 34.95 |
| SDMA          |                      | undiluted      | 17.2  |
| SDMA          |                      | 1 to 10        | 20.23 |
| SDMA          |                      | 1 to 100       | 23.74 |
| SDMA          |                      | 1 to 1000      | 26.94 |
| SDMA          |                      | RNA            | NA    |
| 1st replicate |                      |                |       |
| EF1 $\alpha$  | <i>A. kamchatica</i> | A. kamchatica1 | 16.19 |
| EF1 $\alpha$  | <i>A. kamchatica</i> | A. kamchatica2 | 15.25 |
| EF1 $\alpha$  | <i>A. kamchatica</i> | A. kamchatica3 | 15.19 |
| EF1 $\alpha$  | <i>C. occulta</i>    | C. occulta1    | 14.65 |
| EF1 $\alpha$  | <i>C. occulta</i>    | C. occulta2    | 16.08 |
| EF1 $\alpha$  | <i>C. occulta</i>    | C. occulta3    | 15.21 |
| MA            | <i>A. kamchatica</i> | A. kamchatica1 | 16.23 |
| MA            | <i>A. kamchatica</i> | A. kamchatica2 | 17.71 |

|               |                      |                |       |
|---------------|----------------------|----------------|-------|
| MA            | <i>A. kamchatica</i> | A. kamchatica3 | 17.14 |
| MA            | <i>C. occulta</i>    | C. occulta1    | 19.13 |
| MA            | <i>C. occulta</i>    | C. occulta2    | 20.4  |
| MA            | <i>C. occulta</i>    | C. occulta3    | 27.4  |
| NSP           | <i>A. kamchatica</i> | A. kamchatica1 | 20.21 |
| NSP           | <i>A. kamchatica</i> | A. kamchatica2 | 19.77 |
| NSP           | <i>A. kamchatica</i> | A. kamchatica3 | 20.89 |
| NSP           | <i>C. occulta</i>    | C. occulta1    | 15.57 |
| NSP           | <i>C. occulta</i>    | C. occulta2    | 16.14 |
| NSP           | <i>C. occulta</i>    | C. occulta3    | 15.85 |
| SDMA          | <i>A. kamchatica</i> | A. kamchatica1 | 16.41 |
| SDMA          | <i>A. kamchatica</i> | A. kamchatica2 | 16.78 |
| SDMA          | <i>A. kamchatica</i> | A. kamchatica3 | 16.09 |
| SDMA          | <i>C. occulta</i>    | C. occulta1    | 15.85 |
| SDMA          | <i>C. occulta</i>    | C. occulta2    | 17.12 |
| SDMA          | <i>C. occulta</i>    | C. occulta3    | 17.12 |
| 2nd replicate |                      |                |       |
| EF1 $\alpha$  | <i>A. kamchatica</i> | A. kamchatica1 | 17.55 |
| EF1 $\alpha$  | <i>A. kamchatica</i> | A. kamchatica2 | 15.59 |
| EF1 $\alpha$  | <i>A. kamchatica</i> | A. kamchatica3 | 16.19 |
| EF1 $\alpha$  | <i>C. occulta</i>    | C. occulta1    | 15.29 |
| EF1 $\alpha$  | <i>C. occulta</i>    | C. occulta2    | 16.89 |
| EF1 $\alpha$  | <i>C. occulta</i>    | C. occulta3    | 16.09 |
| MA            | <i>A. kamchatica</i> | A. kamchatica1 | 18.41 |
| MA            | <i>A. kamchatica</i> | A. kamchatica2 | 19.02 |
| MA            | <i>A. kamchatica</i> | A. kamchatica3 | 17.81 |
| MA            | <i>C. occulta</i>    | C. occulta1    | 19.61 |
| MA            | <i>C. occulta</i>    | C. occulta2    | 21.20 |
| MA            | <i>C. occulta</i>    | C. occulta3    | 28.46 |
| NSP           | <i>A. kamchatica</i> | A. kamchatica1 | 21.06 |
| NSP           | <i>A. kamchatica</i> | A. kamchatica2 | 21.57 |
| NSP           | <i>A. kamchatica</i> | A. kamchatica3 | 21.83 |

|       |                      |                |       |
|-------|----------------------|----------------|-------|
| NSP   | <i>C. occulta</i>    | C. occulta1    | 16.39 |
| NSP   | <i>C. occulta</i>    | C. occulta2    | 17.06 |
| NSP   | <i>C. occulta</i>    | C. occulta3    | 16.41 |
| SDMA1 | <i>A. kamchatica</i> | A. kamchatica1 | 18.07 |
| SDMA1 | <i>A. kamchatica</i> | A. kamchatica2 | 17.26 |
| SDMA1 | <i>A. kamchatica</i> | A. kamchatica3 | 16.93 |
| SDMA1 | <i>C. occulta</i>    | C. occulta1    | 16.58 |
| SDMA1 | <i>C. occulta</i>    | C. occulta2    | 17.82 |
| SDMA1 | <i>C. occulta</i>    | C. occulta3    | 17.93 |

**Table S4** Raw qPCR data of *P. napi* fed on four *Arabidopsis* lines

| Target       | Mutant | Samples   | Ct    |
|--------------|--------|-----------|-------|
| Primer check |        |           |       |
| EF1 $\alpha$ |        | undiluted | 16.81 |
| EF1 $\alpha$ |        | 1 to 10   | 18.70 |
| EF1 $\alpha$ |        | 1 to 100  | 22.22 |
| EF1 $\alpha$ |        | 1 to 1000 | 26.18 |
| EF1 $\alpha$ |        | RNA       | NA    |
| MA           |        | undiluted | 16.97 |
| MA           |        | 1 to 10   | 20.58 |
| MA           |        | 1 to 100  | 24.07 |
| MA           |        | 1 to 1000 | 27.75 |
| MA           |        | RNA       | NA    |
| NSP          |        | undiluted | 15.47 |
| NSP          |        | 1 to 10   | 19.03 |
| NSP          |        | 1 to 100  | 22.49 |
| NSP          |        | 1 to 1000 | 26.19 |
| NSP          |        | RNA       | NA    |
| SDMA         |        | undiluted | 16.21 |
| SDMA         |        | 1 to 10   | 19.31 |
| SDMA         |        | 1 to 100  | 23.02 |
| SDMA         |        | 1 to 1000 | 26.71 |
| SDMA         |        | RNA       | NA    |
| EF1 $\alpha$ | Col-0  | Col0-1    | 19.32 |
| EF1 $\alpha$ | Col-0  | Col0-2    | 18.26 |
| EF1 $\alpha$ | Col-0  | Col0-3    | 19.98 |
| EF1 $\alpha$ | Col-0  | Col0-4    | 18.39 |
| EF1 $\alpha$ | Col-0  | Col0-5    | 19.41 |
| EF1 $\alpha$ | MAM1   | MAM1-1    | 18.45 |
| EF1 $\alpha$ | MAM1   | MAM1-2    | 18.05 |
| EF1 $\alpha$ | MAM1   | MAM1-3    | 18.11 |
| EF1 $\alpha$ | MAM1   | MAM1-4    | 17.64 |



|              |         |           |       |
|--------------|---------|-----------|-------|
| EF1 $\alpha$ | MAM1    | MAM1-5    | 17.63 |
| EF1 $\alpha$ | MAM3    | MAM3-1    | 19.08 |
| EF1 $\alpha$ | MAM3    | MAM3-2    | 19.08 |
| EF1 $\alpha$ | MAM3    | MAM3-3    | 19.15 |
| EF1 $\alpha$ | MAM3    | MAM3-4    | 18.06 |
| EF1 $\alpha$ | MAM3    | MAM3-5    | 18.74 |
| EF1 $\alpha$ | quadGLS | quadGLS-1 | 20.1  |
| EF1 $\alpha$ | quadGLS | quadGLS-2 | 18.47 |
| EF1 $\alpha$ | quadGLS | quadGLS-3 | 21.02 |
| EF1 $\alpha$ | quadGLS | quadGLS-4 | 20.02 |
| EF1 $\alpha$ | quadGLS | quadGLS-5 | 19.04 |
| MA           | Col-0   | Col0-1    | 20.05 |
| MA           | Col-0   | Col0-2    | 18.83 |
| MA           | Col-0   | Col0-3    | 22.03 |
| MA           | Col-0   | Col0-4    | 19.7  |
| MA           | Col-0   | Col0-5    | 20.35 |
| MA           | MAM1    | MAM1-1    | 17.98 |
| MA           | MAM1    | MAM1-2    | 18.01 |
| MA           | MAM1    | MAM1-3    | 17.8  |
| MA           | MAM1    | MAM1-4    | 19.44 |
| MA           | MAM1    | MAM1-5    | 17.26 |
| MA           | MAM3    | MAM3-1    | 18.91 |
| MA           | MAM3    | MAM3-2    | 18.43 |
| MA           | MAM3    | MAM3-3    | 20.17 |
| MA           | MAM3    | MAM3-4    | 18.26 |
| MA           | MAM3    | MAM3-5    | 18.24 |
| MA           | quadGLS | quadGLS-1 | 21.04 |
| MA           | quadGLS | quadGLS-2 | 22.47 |
| MA           | quadGLS | quadGLS-3 | 22.8  |
| MA           | quadGLS | quadGLS-4 | 21.15 |
| MA           | quadGLS | quadGLS-5 | 23.09 |
| NSP          | Col-0   | Col0-1    | 17.6  |

|      |         |           |       |
|------|---------|-----------|-------|
| NSP  | Col-0   | Col0-2    | 17.79 |
| NSP  | Col-0   | Col0-3    | 17.7  |
| NSP  | Col-0   | Col0-4    | 17.48 |
| NSP  | Col-0   | Col0-5    | 17.78 |
| NSP  | MAM1    | MAM1-1    | 20.69 |
| NSP  | MAM1    | MAM1-2    | 17.88 |
| NSP  | MAM1    | MAM1-3    | 18.16 |
| NSP  | MAM1    | MAM1-4    | 18.16 |
| NSP  | MAM1    | MAM1-5    | 20.06 |
| NSP  | MAM3    | MAM3-1    | 17.89 |
| NSP  | MAM3    | MAM3-2    | 17.42 |
| NSP  | MAM3    | MAM3-3    | 17.49 |
| NSP  | MAM3    | MAM3-4    | 17.06 |
| NSP  | MAM3    | MAM3-5    | 17.72 |
| NSP  | quadGLS | quadGLS-1 | 19.69 |
| NSP  | quadGLS | quadGLS-2 | 17.68 |
| NSP  | quadGLS | quadGLS-3 | 21.45 |
| NSP  | quadGLS | quadGLS-4 | 20.19 |
| NSP  | quadGLS | quadGLS-5 | 18.36 |
| SDMA | Col-0   | Col0-1    | 18.19 |
| SDMA | Col-0   | Col0-2    | 16.44 |
| SDMA | Col-0   | Col0-3    | 18.27 |
| SDMA | Col-0   | Col0-4    | 17.45 |
| SDMA | Col-0   | Col0-5    | 18.22 |
| SDMA | MAM1    | MAM1-1    | 17.78 |
| SDMA | MAM1    | MAM1-2    | 17.29 |
| SDMA | MAM1    | MAM1-3    | 16.22 |
| SDMA | MAM1    | MAM1-4    | 17.32 |
| SDMA | MAM1    | MAM1-5    | 17.33 |
| SDMA | MAM3    | MAM3-1    | 18.13 |
| SDMA | MAM3    | MAM3-2    | 18.57 |
| SDMA | MAM3    | MAM3-3    | 18.49 |

|      |         |           |       |
|------|---------|-----------|-------|
| SDMA | MAM3    | MAM3-4    | 17.32 |
| SDMA | MAM3    | MAM3-5    | 18.94 |
| SDMA | quadGLS | quadGLS-1 | 19.13 |
| SDMA | quadGLS | quadGLS-2 | 17.8  |
| SDMA | quadGLS | quadGLS-3 | 20.67 |
| SDMA | quadGLS | quadGLS-4 | 19.59 |
| SDMA | quadGLS | quadGLS-5 | 18.68 |
